# Supplementary material for: Exploring the Mechanism of Baicalin Intervention in Breast Cancer Based on MicroRNA Microarrays and Bioinformatics Strategies
Source: Hindawi journal article supplement (doi:10.1155/2021/7624415), 2021-12-20
Supplement: f1 [file 7624415.f1.pdf]

**Table S1 Bioinformatics Analysis of Differential expressed microRNA**

| Category     | Term       | Description               | Count | %        | PValue   | Genes                 | Fold Enric |
|--------------|------------|---------------------------|-------|----------|----------|-----------------------|------------|
|              | GO:0006351 | transcription, DNA-tem    | 424   | 14.40217 | 2.49E-13 | ZNF175, N             | 1.37221    |
|              | GO:0006355 | regulation of transcripti | 323   | 10.97147 | 1.04E-09 | ZNF175, B             | 1.358802   |
|              | GO:0000122 | negative regulation of tr | 165   | 5.60462  | 3.52E-07 | WWC1, UI              | 1.44995    |
|              | GO:0045893 | positive regulation of tr | 125   | 4.245924 | 4.86E-07 | RORA, ET              | 1.535693   |
|              | GO:0045892 | negative regulation of tr | 120   | 4.076087 | 1.39E-06 | RBPJ, PHE             | 1.521536   |
|              | GO:0071456 | cellular response to hyp  | 34    | 1.154891 | 5.76E-06 | ERO1A, A              | 2.240831   |
|              | GO:0046777 | protein autophosphoryla   | 50    | 1.69837  | 1.67E-05 | DDR1, SM              | 1.83926    |
|              | GO:0098609 | cell-cell adhesion        | 70    | 2.377717 | 2.50E-05 | MRE11, DI             | 1.634294   |
|              | GO:0006366 | transcription from RNA    | 117   | 3.974185 | 2.60E-05 | CCNT1, N              | 1.443012   |
|              | GO:0006974 | cellular response to DN   | 56    | 1.902174 | 5.35E-05 | CDKN1A,               | 1.703437   |
|              | GO:0016567 | protein ubiquitination    | 86    | 2.921196 | 5.64E-05 | TRIM72, U             | 1.515673   |
|              | GO:0031647 | regulation of protein sta | 25    | 0.849185 | 1.09E-04 | KHDRBS1               | 2.259662   |
|              | GO:0045944 | positive regulation of tr | 198   | 6.725543 | 1.33E-04 | EIF4A3, SI            | 1.27702    |
|              | GO:0070534 | protein K63-linked ubiq   | 16    | 0.543478 | 2.66E-04 | UBE2D4, U             | 2.736023   |
|              | GO:0016055 | Wnt signaling pathway     | 49    | 1.664402 | 3.28E-04 | DRAXIN, '             | 1.657891   |
|              | GO:0017148 | negative regulation of tr | 21    | 0.713315 | 3.66E-04 | NANOS1, '             | 2.29083    |
|              | GO:0018107 | peptidyl-threonine phosj  | 16    | 0.543478 | 3.76E-04 | PDPK1, D'             | 2.664023   |
|              | GO:0043065 | positive regulation of ap | 71    | 2.411685 | 3.83E-04 | MTCH2, C              | 1.497403   |
|              | GO:0008284 | positive regulation of ce | 102   | 3.464674 | 4.34E-04 | KLB, VIPF             | 1.384892   |
|              | GO:0050821 | protein stabilization     | 38    | 1.290761 | 4.64E-04 | CDKN1A,               | 1.767853   |
|              | GO:0030511 | positive regulation of tr | 12    | 0.407609 | 5.03E-04 | TGFBR3, S             | 3.163527   |
|              | GO:0007223 | Wnt signaling pathway,    | 16    | 0.543478 | 5.23E-04 | TCF7L2, F             | 2.595714   |
|              | GO:0008285 | negative regulation of ce | 88    | 2.98913  | 6.71E-04 | DDR1, CD              | 1.406012   |
|              | GO:0010863 | positive regulation of ph | 7     | 0.237772 | 8.42E-04 | PDGFRA, I             | 4.921042   |
| ogical proce | GO:0007264 | small GTPase mediated     | 59    | 2.004076 | 8.87E-04 | RAB3B, A              | 1.517464   |
|              | GO:0005654 | nucleoplasm               | 593   | 20.14266 | 1.15E-20 | ZNF175, H             | 1.392811   |
|              | GO:0005634 | nucleus                   | 1032  | 35.05435 | 4.46E-20 | RBPJ, NOC             | 1.246201   |
|              | GO:0005829 | cytosol                   | 660   | 22.41848 | 1.68E-15 | USP6NL, F             | 1.301869   |
|              | GO:0016020 | membrane                  | 448   | 15.21739 | 8.06E-12 | PI4K2B, TI            | 1.331564   |
|              | GO:0005737 | cytoplasm                 | 941   | 31.96332 | 1.12E-10 | RBPJ, NOC             | 1.17831    |
|              | GO:0005730 | nucleolus                 | 186   | 6.317935 | 3.23E-07 | SRP19, MI             | 1.419185   |
|              | GO:0005789 | endoplasmic reticulum r   | 184   | 6.25     | 1.20E-06 | ERO1A, F <sub>2</sub> | 1.395781   |
|              | GO:0000790 | nuclear chromatin         | 56    | 1.902174 | 1.89E-06 | LDB1, NU              | 1.897306   |
|              | GO:0005913 | cell-cell adherens juncti | 79    | 2.683424 | 1.78E-05 | MRE11, DI             | 1.599305   |
|              | GO:0005622 | intracellular             | 257   | 8.72962  | 3.22E-05 | ZNF175, C             | 1.261641   |
|              | GO:0016604 | nuclear body              | 16    | 0.543478 | 3.72E-05 | ZNF496, Z             | 3.170391   |
|              | GO:0005794 | Golgi apparatus           | 175   | 5.944293 | 4.97E-05 | UBXN2B,               | 1.325971   |
|              | GO:0043234 | protein complex           | 91    | 3.091033 | 2.22E-04 | CDKN1A,               | 1.444278   |
|              | GO:0005925 | focal adhesion            | 87    | 2.955163 | 2.39E-04 | ARF1, FLI             | 1.454954   |
|              | GO:0005905 | clathrin-coated pit       | 20    | 0.679348 | 3.24E-04 | CUBN, TF              | 2.377793   |
|              | GO:0005739 | mitochondrion             | 249   | 8.45788  | 3.28E-04 | TDRKH, IS             | 1.223286   |
|              | GO:0000792 | heterochromatin           | 11    | 0.373641 | 4.76E-04 | CBX8, ME              | 3.425154   |
|              | GO:0031463 | Cul3-RING ubiquitin lig   | 22    | 0.747283 | 7.18E-04 | KLHL36, F             | 2.147112   |
|              | GO:0005643 | nuclear pore              | 23    | 0.78125  | 7.98E-04 | EIF5A, EIF            | 2.088825   |
|              | GO:0048471 | perinuclear region of cy  | 125   | 4.245924 | 8.38E-04 | RAB3B, P <sub>2</sub> | 1.31621    |
|              | GO:0005793 | endoplasmic reticulum-t   | 22    | 0.747283 | 8.92E-04 | TRAPPC2,              | 2.115536   |
|              | GO:0033116 | endoplasmic reticulum-t   | 21    | 0.713315 | 9.93E-04 | MCFD2, SI             | 2.145587   |
|              | GO:0005667 | transcription factor com  | 47    | 1.596467 | 0.001159 | RBPJL, LI             | 1.592382   |
|              | GO:0031519 | PcG protein complex       | 12    | 0.407609 | 0.00126  | CBX8, YY              | 2.906191   |
| all compone  | GO:0005741 | mitochondrial outer mer   | 38    | 1.290761 | 0.001556 | MTCH2, D              | 1.667647   |
|              | GO:0005515 | protein binding           | 1651  | 56.08016 | 3.20E-28 | TFRC, ITS             | 1.184658   |

|                |            |                            |     |          |          |            |          |
|----------------|------------|----------------------------|-----|----------|----------|------------|----------|
|                | GO:0044822 | poly(A) RNA binding        | 253 | 8.59375  | 2.34E-09 | TFRC, EIF  | 1.412584 |
|                | GO:0003677 | DNA binding                | 347 | 11.78668 | 2.33E-08 | ZNF175, H  | 1.306657 |
|                | GO:0031625 | ubiquitin protein ligase   | 82  | 2.785326 | 6.43E-08 | GPI, CDK1  | 1.801024 |
|                | GO:0003676 | nucleic acid binding       | 217 | 7.370924 | 1.53E-07 | ZNF175, E  | 1.388709 |
|                | GO:0008134 | transcription factor bind  | 80  | 2.717391 | 1.81E-07 | DDX3X, C   | 1.775658 |
|                | GO:0046872 | metal ion binding          | 408 | 13.8587  | 4.47E-07 | ZNF175, Z  | 1.243046 |
|                | GO:0003700 | transcription factor activ | 205 | 6.963315 | 3.63E-06 | ZNF175, IF | 1.344677 |
|                | GO:0019003 | GDP binding                | 23  | 0.78125  | 1.02E-05 | RAB3B, PI  | 2.68486  |
|                | GO:0000978 | RNA polymerase II core     | 86  | 2.921196 | 4.23E-05 | ZNF253, G  | 1.527066 |
|                | GO:0003729 | mRNA binding               | 38  | 1.290761 | 7.77E-05 | FYTTD1, I  | 1.91629  |
|                | GO:0004842 | ubiquitin-protein transfe  | 79  | 2.683424 | 1.21E-04 | TRIM71, U  | 1.513627 |
|                | GO:0098641 | cadherin binding involv    | 71  | 2.411685 | 1.49E-04 | MRE11, D   | 1.543291 |
|                | GO:0003714 | transcription corepresso   | 53  | 1.800272 | 2.21E-04 | KDM5B, L   | 1.645764 |
|                | GO:0019901 | protein kinase binding     | 86  | 2.921196 | 3.37E-04 | USP37, HS  | 1.441777 |
|                | GO:0017137 | Rab GTPase binding         | 38  | 1.290761 | 3.65E-04 | USP6NL, C  | 1.787584 |
|                | GO:0042802 | identical protein binding  | 154 | 5.230978 | 4.09E-04 | TFRC, AR   | 1.296064 |
|                | GO:0005484 | SNAP receptor activity     | 16  | 0.543478 | 5.44E-04 | STX17, ST  | 2.586086 |
|                | GO:0032403 | protein complex binding    | 52  | 1.766304 | 5.98E-04 | CDKN1A,    | 1.591196 |
|                | GO:0005525 | GTP binding                | 86  | 2.921196 | 6.77E-04 | RAB3B, C   | 1.41174  |
|                | GO:0003682 | chromatin binding          | 87  | 2.955163 | 7.79E-04 | CCNT1, LI  | 1.402588 |
|                | GO:0046332 | SMAD binding               | 16  | 0.543478 | 0.001754 | SMAD2, H   | 2.34552  |
|                | GO:0042803 | protein homodimerizati     | 146 | 4.959239 | 0.001848 | SLC27A1,   | 1.260717 |
|                | GO:0044325 | ion channel binding        | 31  | 1.052989 | 0.00244  | HSP90AB1   | 1.729302 |
| molecular func | GO:0031435 | mitogen-activated protei   | 9   | 0.305707 | 0.002495 | MAP2K4, I  | 3.337192 |
|                | hsa05212   | Pancreatic cancer          | 29  | 0.985054 | 1.57E-07 | PIK3CD, T  | 2.802824 |
|                | hsa04144   | Endocytosis                | 69  | 2.34375  | 5.94E-07 | ARF1, TFF  | 1.798636 |
|                | hsa05200   | Pathways in cancer         | 100 | 3.396739 | 6.89E-07 | ETS1, FGF  | 1.598522 |
|                | hsa04115   | p53 signaling pathway      | 28  | 0.951087 | 1.31E-06 | CDKN1A,    | 2.625394 |
|                | hsa05215   | Prostate cancer            | 33  | 1.120924 | 2.09E-06 | CDKN1A,    | 2.355822 |
|                | hsa05214   | Glioma                     | 27  | 0.91712  | 2.42E-06 | CDKN1A,    | 2.609526 |
|                | hsa05210   | Colorectal cancer          | 26  | 0.883152 | 3.18E-06 | LEF1, PIK  | 2.634468 |
|                | hsa04390   | Hippo signaling pathwa     | 47  | 1.596467 | 4.44E-06 | PATJ, BMI  | 1.955384 |
|                | hsa04068   | FoxO signaling pathway     | 43  | 1.460598 | 5.20E-06 | CDKN1A,    | 2.015927 |
|                | hsa05220   | Chronic myeloid leuken     | 28  | 0.951087 | 6.67E-06 | CDKN1A,    | 2.443075 |
|                | hsa04550   | Signaling pathways regu    | 43  | 1.460598 | 1.75E-05 | BMPR2, W   | 1.92953  |
|                | hsa05205   | Proteoglycans in cancer    | 55  | 1.868207 | 3.42E-05 | CDKN1A,    | 1.727603 |
|                | hsa05221   | Acute myeloid leukemia     | 22  | 0.747283 | 6.99E-05 | TCF7L2, Z  | 2.468004 |
|                | hsa05222   | Small cell lung cancer     | 29  | 0.985054 | 7.21E-05 | PTEN, XI   | 2.143336 |
|                | hsa05161   | Hepatitis B                | 42  | 1.42663  | 9.86E-05 | CDKN1A,    | 1.819669 |
|                | hsa05166   | HTLV-I infection           | 64  | 2.173913 | 1.26E-04 | CDKN1A,    | 1.582914 |
|                | hsa05218   | Melanoma                   | 25  | 0.849185 | 1.48E-04 | CDKN1A,    | 2.212039 |
|                | hsa05223   | Non-small cell lung can    | 21  | 0.713315 | 2.25E-04 | CDKN2A,    | 2.355822 |
|                | hsa05169   | Epstein-Barr virus infec   | 35  | 1.188859 | 5.07E-04 | RBPJL, CI  | 1.802268 |
|                | hsa05160   | Hepatitis C                | 37  | 1.256793 | 6.42E-04 | CDKN1A,    | 1.747677 |
|                | hsa04110   | Cell cycle                 | 35  | 1.188859 | 6.98E-04 | CDKN1A,    | 1.773199 |
|                | hsa04012   | ErbB signaling pathway     | 27  | 0.91712  | 7.24E-04 | CDKN1A,    | 1.949646 |
|                | hsa04722   | Neurotrophin signaling     | 34  | 1.154891 | 7.87E-04 | CAMK2A,    | 1.779954 |
|                | hsa04350   | TGF-beta signaling path    | 26  | 0.883152 | 9.72E-04 | BMPR2, A   | 1.944488 |
| nalng path     | hsa04520   | Adherens junction          | 23  | 0.78125  | 0.001068 | SMAD2, T   | 2.035076 |

**Bonferroni**

1.50E-09  
6.27E-06  
0.002119  
0.002929  
0.008348  
0.034159  
0.095724  
0.139911  
0.145391  
0.275689  
0.288669  
0.482911  
0.552532  
0.799344  
0.862127  
0.890065  
0.896611  
0.901068  
0.926958  
0.939126  
0.952014  
0.957317  
0.982603  
0.993809  
0.995276

1.08E-17  
4.20E-17  
1.57E-12  
7.60E-09  
1.06E-07  
3.04E-04  
0.001128  
0.00178  
0.016682  
0.029918  
0.034514  
0.045822  
0.189204  
0.202007  
0.263383  
0.266265  
0.361758  
0.492151  
0.528953  
0.546445  
0.568785  
0.608101  
0.66514  
0.695567  
0.769749

6.07E-25

4.43E-06  
4.43E-05  
1.22E-04  
2.91E-04  
3.43E-04  
8.49E-04  
0.006868  
0.019243  
0.077194  
0.137157  
0.205291  
0.246565  
0.342188  
0.472394  
0.500237  
0.539744  
0.644404  
0.679017  
0.723902  
0.77245  
0.96434  
0.970195  
0.990334  
0.991299

4.55E-05  
1.72E-04  
1.99E-04  
3.78E-04  
6.03E-04  
7.00E-04  
9.19E-04  
0.001283  
0.001502  
0.001927  
0.005034  
0.009842  
0.020007  
0.020623  
0.028082  
0.035863  
0.041952  
0.063035  
0.136214  
0.169275  
0.182839  
0.188792  
0.203447  
0.244908  
0.265777
